# Supplementary material for: Salt-Responsive Metabolite, β-Hydroxybutyrate, Attenuates Hypertension
Source: PubMed Central journal article supplement — Cell Rep. Author manuscript; Available in PMC 2019 May 30. (PMC6542293; doi:10.1016/j.celrep.2018.09.058), 2018-10-16
Supplement: NIHMS1012479-supplement-1.pdf [file NIHMS1012479-supplement-1.pdf]

**Cell Reports, Volume 25**

**Supplemental Information**

**Salt-Responsive Metabolite,  $\beta$ -Hydroxybutyrate,  
Attenuates Hypertension**

**Saroj Chakraborty, Sarah Galla, Xi Cheng, Ji-Youn Yeo, Blair Mell, Vishal Singh, BengSan Yeoh, Piu Saha, Anna V. Mathew, Matam Vijay-Kumar, and Bina Joe**

SUPPLEMENTAL FILES

Supplemental Figure 1

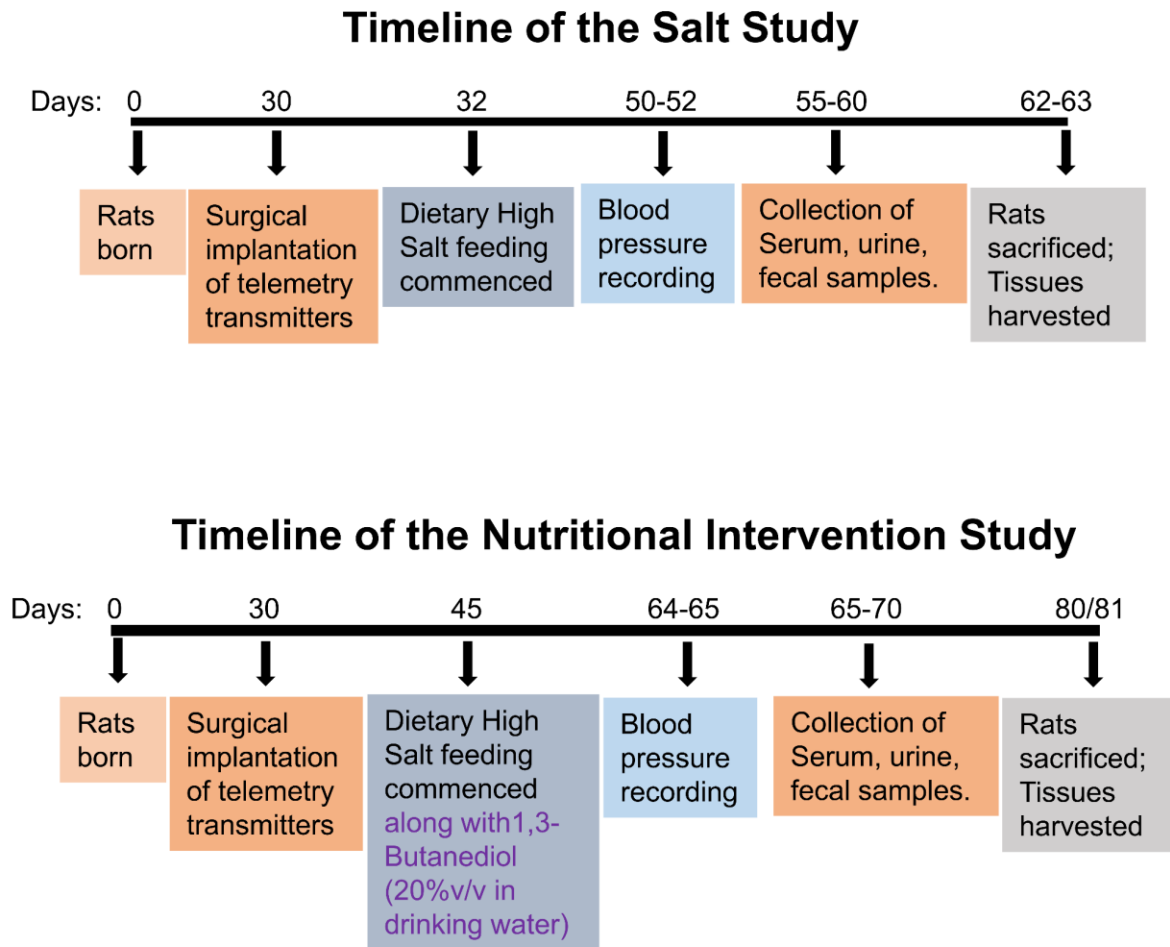

Figure S1. Timeline of the Salt and Nutritional Intervention study. Related to Figures 1 and 3.

## Supplemental Figure 2

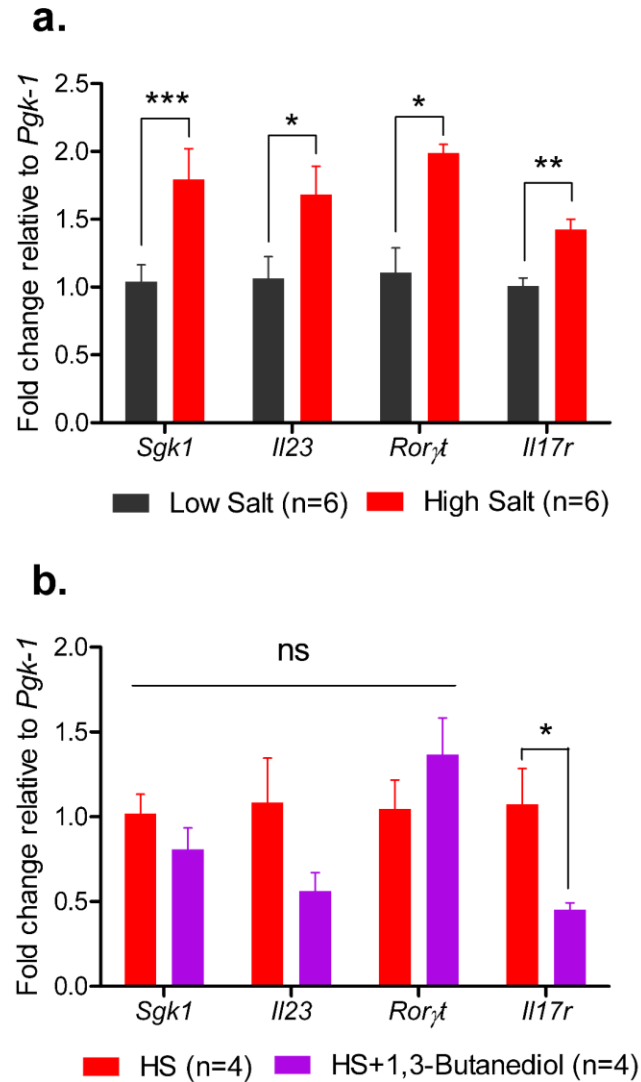

**Figure S2. (a) Aberrant renal profile of markers associated with salt induced Th17 activation. \*  $p < 0.05$ , \*\*  $p < 0.01$ , \*\*\*  $p < 0.001$ . (b) Effect of nutritional intervention with  $\beta$ OHB on renal profile of markers associated with salt induced Th17 activation. HS: High Salt; ns: not significant, \*  $p < 0.05$ . Related to Figures 4 and 5.**

## Supplemental Figure 3

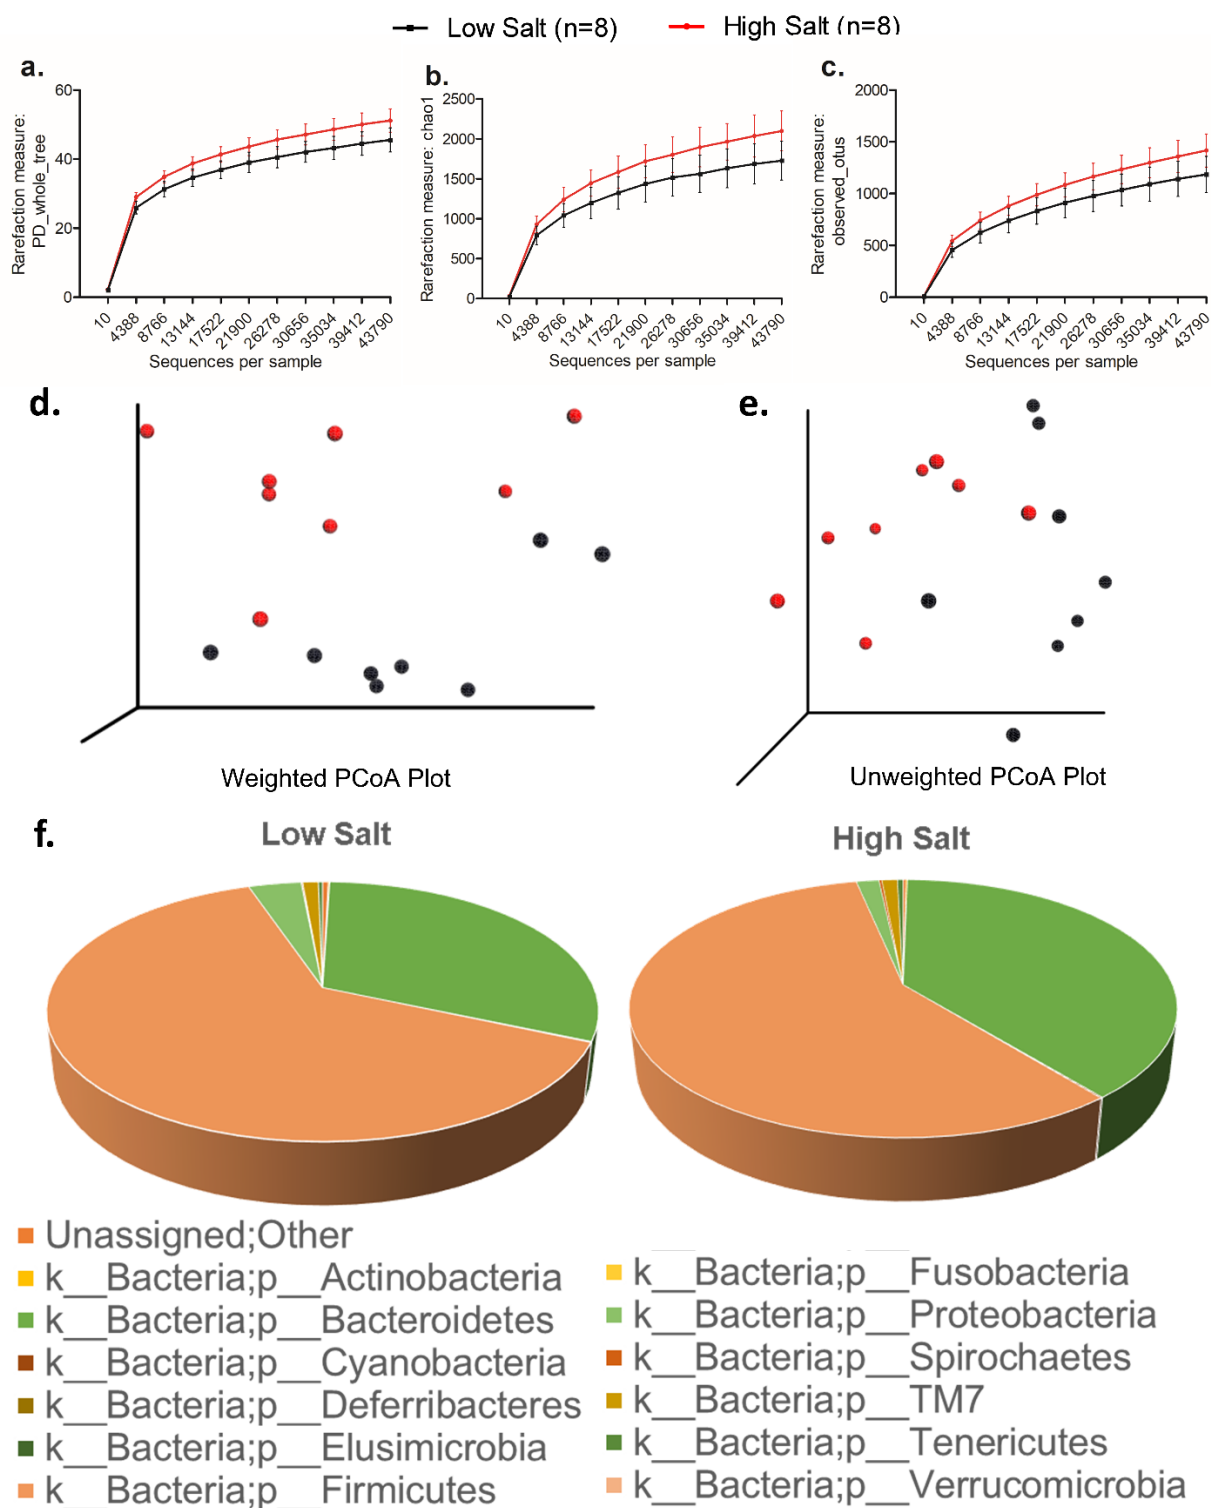

**Figure S3. Salt loading results in alterations in gut microbiota. Related to Figure 4**

# Supplemental Figure 4

— High Salt (n=12) — HS+1,3-Butanediol (n=12)

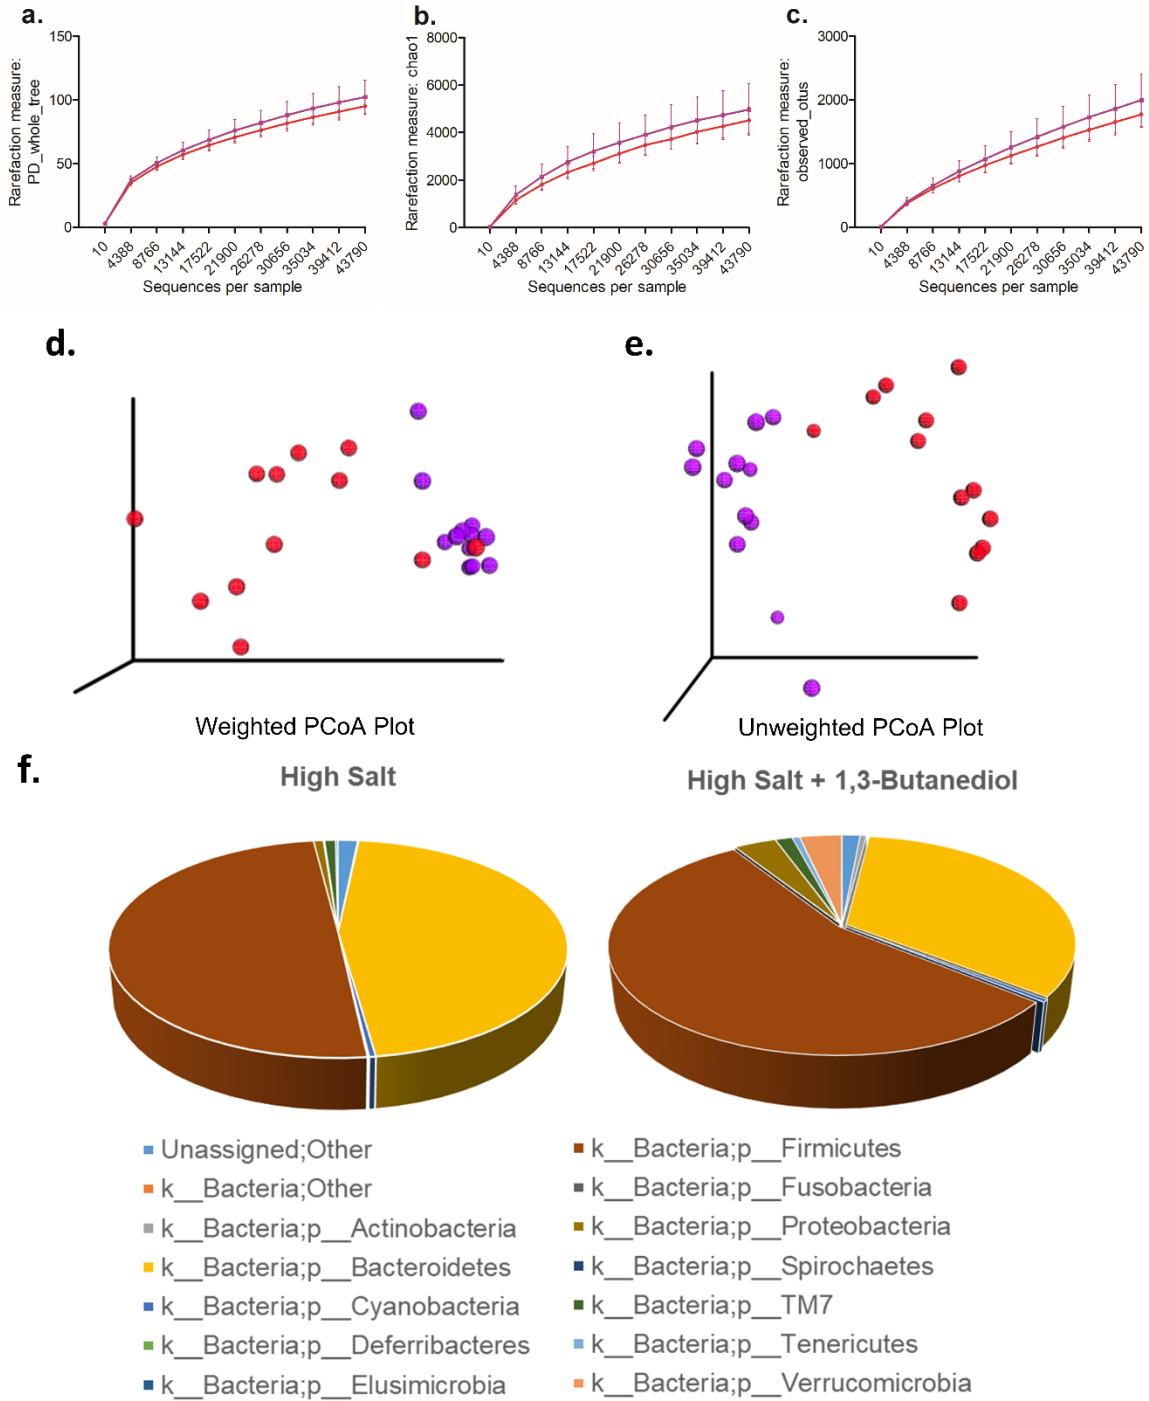

**Figure S4. Nutritional intervention with  $\beta$ OHB leads to alterations in gut microbiota.**

Related to Figure 5.

## Supplemental Figure 5

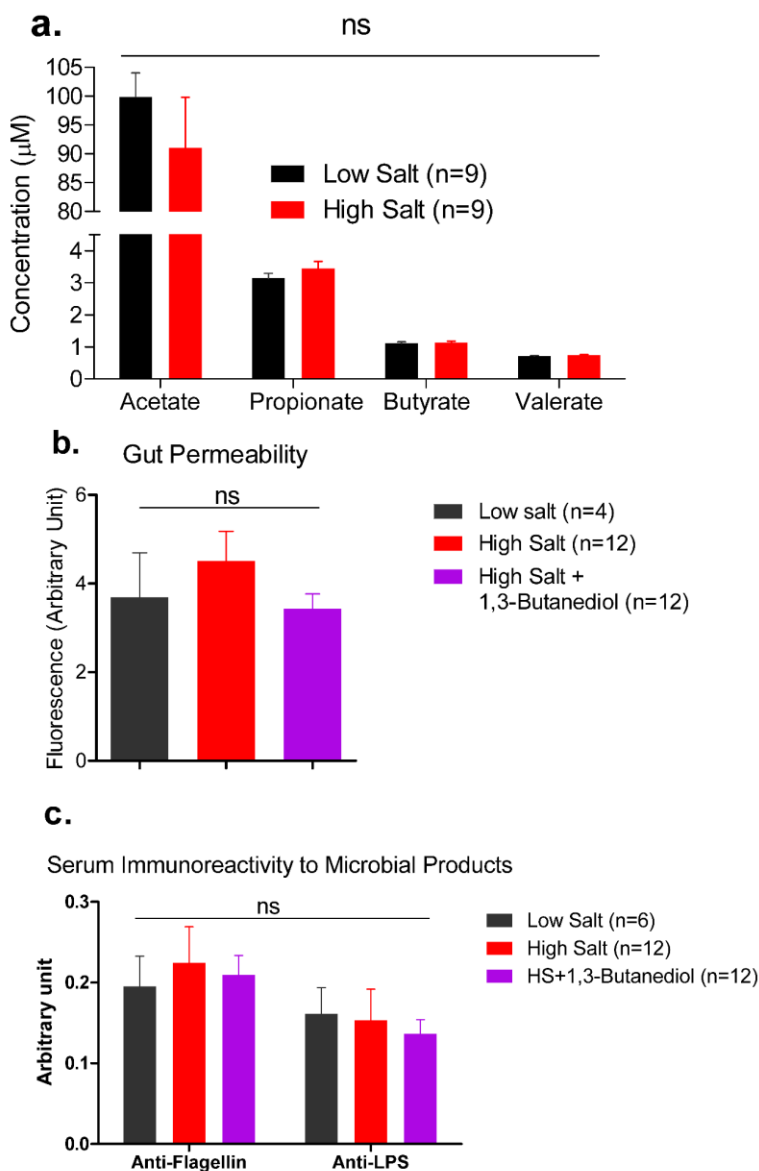

**Figure S5. (a) Salt-loading did not alter plasma microbial derived short-chain fatty acids. ns: not significant. (b) Gut permeability was unchanged by salt loading or intervention of the high salt group with 1,3-butanediol. ns: not significant. (c) Serum immunoreactivity to bacterial products were unchanged between the 3 groups. HS: High Salt; ns: not significant. Related to Figures 4 and 5.**

## Supplemental Figure 6

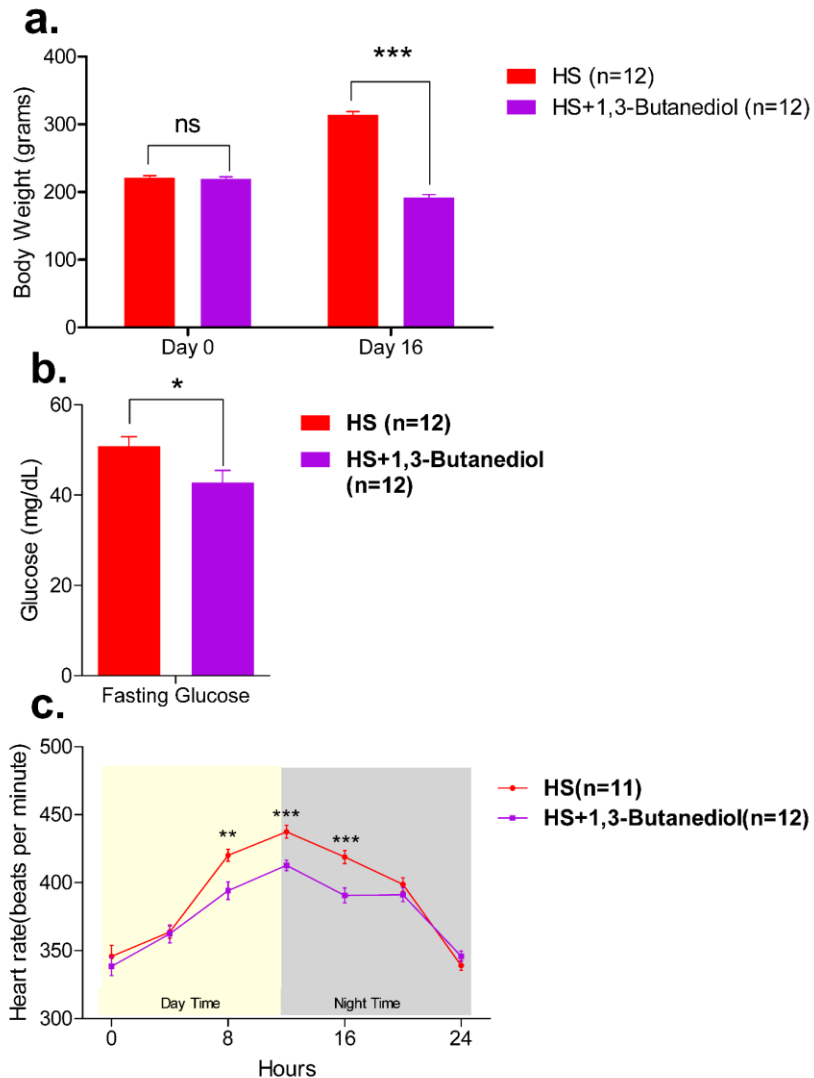

**Figure S6. Nutritional intervention with 1,3-Butanediol lowered body weight and fasting glucose.** (a) Body weight of rats at day 0 (starting point of high salt and nutritional intervention) and day 16 (post 16 days of administration of  $\beta$ OHB with 1,3-Butanediol). (b) Fasting glucose level of HS and HS+1,3-Butanediol post 3 weeks of 1,3-Butanediol administration. (c) Heart rate of HS and HS+1,3-Butanediol post 3 weeks of 1,3-Butanediol administration. HS: High salt; ns: not significant, \*  $p < 0.05$ , \*\*  $p < 0.01$ , \*\*\*  $p < 0.001$ . **Related to Figures 3 and 6.**

## Supplemental Figure 7

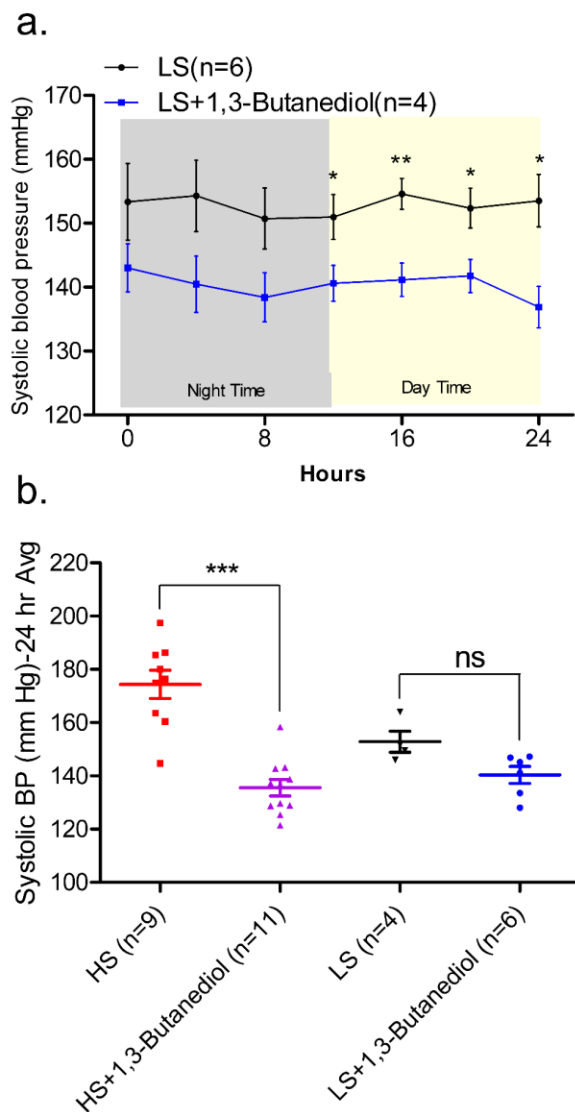

**Figure S7. Systolic blood pressure comparison in Salt and 1,3-Butanediol intervention.** (a) Systolic blood pressure of LS and LS+1,3-Butanediol post 3 weeks of intervention. (b) 24 hour average systolic blood pressure of HS, HS+1,3-Butanediol, LS, LS+1,3-Butanediol post 3 weeks of 1,3-Butanediol administration. LS: Low salt, HS: High salt; ns: not significant, \*  $p<0.05$ , \*\*  $p<0.01$ , \*\*\*  $p<0.001$ . **Related to Figures 1 and 3**



**Supplemental Table 1:** List of mean of all the significantly different metabolites' mean height peaks generated through GC-TOF-MS based untargeted metabolomics. **Related to Figure 2.**

| BinBase name            | Fasting Plasma Metabolites |                | t-test   | Mean(HS)-Mean(LS) | Ranked based on value of Mean(HS)-Mean (LS) |
|-------------------------|----------------------------|----------------|----------|-------------------|---------------------------------------------|
|                         | Mean Low Salt              | Mean High Salt |          |                   |                                             |
| 3-hydroxybutyric acid   | 740065.6                   | 518790.7       | 0.033568 | -221274.9         | 1                                           |
| stearic acid            | 503116.1                   | 418287.3       | 0.042409 | -84828.78         | 3                                           |
| 7458                    | 8427.556                   | 4298.778       | 0.00296  | -4128.778         | 9                                           |
| xylose                  | 9477.667                   | 5606           | 0.029512 | -3871.667         | 10                                          |
| 133026                  | 7591.333                   | 4967.667       | 0.043349 | -2623.667         | 14                                          |
| 4721                    | 4850.556                   | 2708.333       | 0.03389  | -2142.222         | 17                                          |
| 4723                    | 4771                       | 2821.222       | 0.008215 | -1949.778         | 18                                          |
| 14736                   | 3946.444                   | 2343.222       | 0.047469 | -1603.222         | 21                                          |
| heptadecanoic acid      | 5542.889                   | 4260           | 0.038143 | -1282.889         | 23                                          |
| 41862                   | 623.8889                   | 908.5556       | 0.045398 | 284.66667         | 29                                          |
| 130466                  | 655.7778                   | 955.3333       | 0.030354 | 299.55556         | 28                                          |
| 5935                    | 418.4444                   | 740.3333       | 0.017416 | 321.88889         | 27                                          |
| 240510                  | 1644                       | 2049.556       | 0.006502 | 405.55556         | 26                                          |
| 209686                  | 884.2222                   | 1303.778       | 0.035521 | 419.55556         | 25                                          |
| 4747                    | 356.5556                   | 827.3333       | 0.002345 | 470.77778         | 24                                          |
| phosphoenolpyruvate     | 828.3333                   | 2368.889       | 0.02539  | 1540.5556         | 22                                          |
| 240048                  | 4214.667                   | 5924.667       | 0.001249 | 1710              | 20                                          |
| 247704                  | 2590.778                   | 4400.222       | 0.040984 | 1809.4444         | 19                                          |
| allantoic acid          | 2368.444                   | 4774           | 0.002219 | 2405.5556         | 16                                          |
| beta-sitosterol         | 3858                       | 6452           | 0.008491 | 2594              | 15                                          |
| 93947                   | 3033.667                   | 5711.111       | 0.002887 | 2677.4444         | 13                                          |
| arachidonic acid        | 7939.444                   | 10789.67       | 0.033295 | 2850.2222         | 12                                          |
| conduritol-beta-epoxide | 5873.222                   | 8997.667       | 0.00191  | 3124.4444         | 11                                          |
| 4956                    | 12942.22                   | 18188.33       | 0.027428 | 5246.1111         | 8                                           |
| aspartic acid           | 35553.78                   | 46841.67       | 0.048754 | 11287.889         | 7                                           |
| ethanolamine            | 18684.11                   | 32835.89       | 0.039953 | 14151.778         | 6                                           |
| 219478                  | 57249.89                   | 75430.11       | 0.011592 | 18180.222         | 5                                           |
| threonine               | 184105.3                   | 216072         | 0.039557 | 31966.667         | 4                                           |
| creatinine              | 203515.7                   | 309223.6       | 0.036295 | 105707.89         | 2                                           |

**Supplemental Table 2:** List of all primers with forward and reverse sequence. **Related to STAR methods, Figures 6, and 7.**

| Gene                           |         | Sequence (5'-3')                                       |
|--------------------------------|---------|--------------------------------------------------------|
| <i>Casp1</i>                   | Forward | CCGGGCAAGCCAGATGTTTA                                   |
|                                | Reverse | CCAGGAAATGCGCCACCTTC                                   |
| <i>Nlrp3</i>                   | Forward | AATGGGGAGGAGAAGGCGTG                                   |
|                                | Reverse | AAGGCTGTCTTCCTGGCACA                                   |
| <i>IL1<math>\beta</math></i>   | Forward | GCACTGCAGGCTTCGAGATG                                   |
|                                | Reverse | CCCAAGGCCACAGGGATTTTG                                  |
| <i>IL18</i>                    | Forward | AGAGGACTGGCTGTGACCCT                                   |
|                                | Reverse | GTTGTGTCCTGGCACACGTT                                   |
| <i>Lcn2</i>                    | Forward | GAACCAAGGGGCTGTCCGAT                                   |
|                                | Reverse | ACGCTCACCGTCTGTTCAGT                                   |
| <i>Hif1<math>\alpha</math></i> | Forward | GGCGGCGAGAACGAGAAGAA                                   |
|                                | Reverse | AGCTCACGTTGTGGGGAAGT                                   |
| <i>Tgfb1</i>                   | Forward | GGCAGTGGCTGAACCAAGGA                                   |
|                                | Reverse | GGAGCAGGAAGGGTTCGGTTC                                  |
| <i>Serpine1</i>                | Forward | TTCAAGCTCTTCCGGACCAC                                   |
|                                | Reverse | AATAGAGGGCGTTCACCAGC                                   |
| <i>Col1a2</i>                  | Forward | CTGCTGGCCCAATGGATTT                                    |
|                                | Reverse | CCATCACACGACTTCCAGC                                    |
| <i>RoryT</i>                   | Forward | GCTGGCTGCAAAGAAGACCC                                   |
|                                | Reverse | CTGACGGGTGCAGGAGTAGG                                   |
| <i>IL23</i>                    | Forward | TGCACACACACCAGTGGGAC                                   |
|                                | Reverse | AAACACCAGACCTTGGCGGAT                                  |
| <i>Sgk1</i>                    | Forward | GAGCGAGTCCGTCTGCTAA                                    |
|                                | Reverse | TGGCGTTCATAAGTTCGGGC                                   |
| <i>IL17r</i>                   | Forward | CTGGCCACGGGTCGTC                                       |
|                                | Reverse | GAAGACGGCGTCAGGTTTCG                                   |
| 16s rRNA (V3-V4 region)        | Forward | TCGTCGGCAGCGTCAGATGTGTATAAGAGACAGCCTACGGGNGGCWGCAG     |
|                                | Reverse | GTCTCGTGGGCTCGGAGATGTGTATAAGAGACAGGGACTACHVGGGTWTCTAAT |
